# Supplementary material for: Spherical, flower-like MnCo2O4with a hollow structure as the cathode for efficient Li-CO2batteries
Source: Royal Society of Chemistry journal article supplement (doi:10.1039/d2qi02025d), 2022-11-29
Supplement: d2qi02025d1.pdf [file d2qi02025d1.pdf]

**Spherical flower  $\text{MnCo}_2\text{O}_4$  with hollow structure as cathode for efficient Li- $\text{CO}_2$  battery**

Yangyang Fan,<sup>a</sup> Yang Liu,<sup>\*a</sup> Zhao Chen,<sup>a</sup> Feijian Lou,<sup>\* a</sup> Xiangdong Lou,<sup>a</sup> Yun Qiao<sup>\*b</sup>

<sup>a</sup> School of Chemistry and Chemical Engineering, Key Laboratory of Green Chemical Media and Reactions, Ministry of Education, Henan Normal University, Xinxiang, Henan 453007, China.

E-mail: liuy986@htu.edu.cn; liuy986@163.com. loufeijian@htu.edu.cn.

<sup>b</sup> School of Environment and Chemical Engineering, Shanghai University, Shanghai, 200444, China.

E-mail: yunqiao@shu.edu.cn.

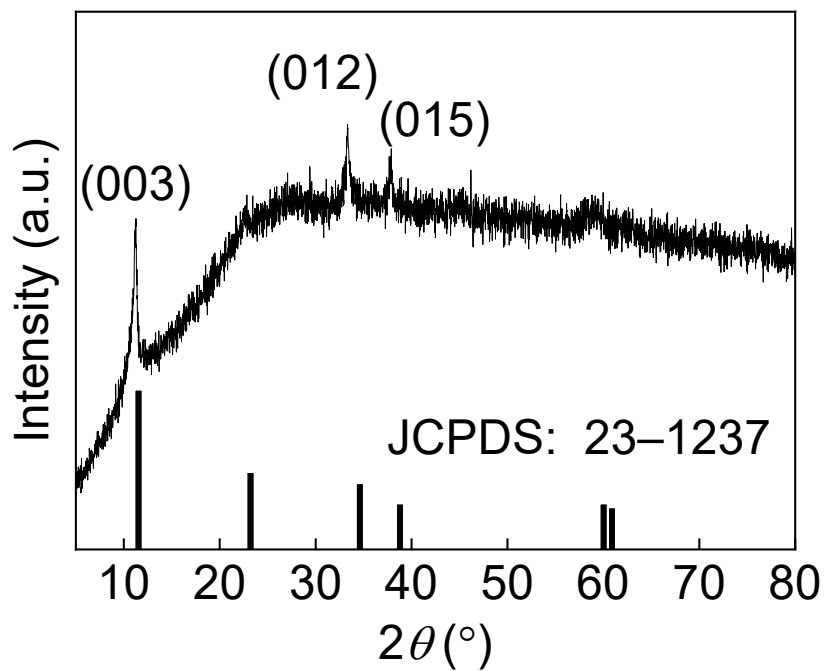

**Figure S1.** XRD pattern of MnCo-hydroxides.

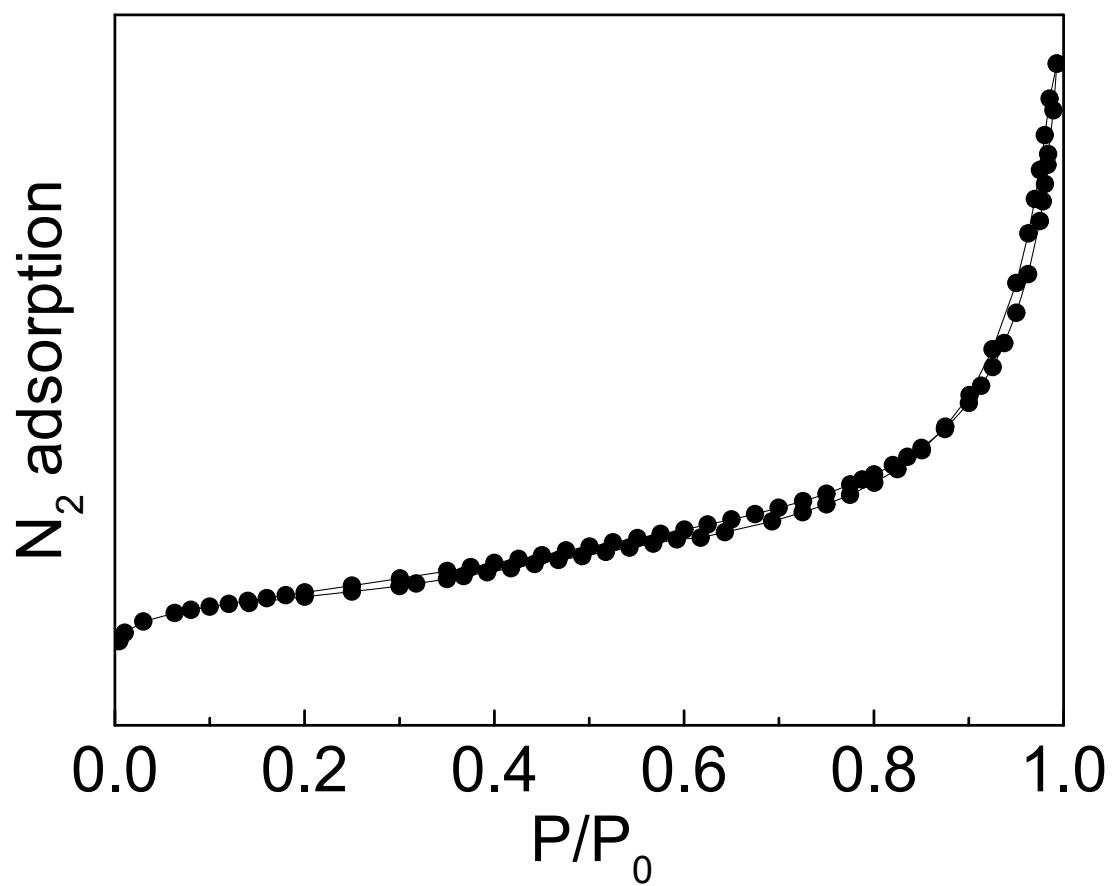

**Figure S2.** The nitrogen adsorption-desorption isotherms.

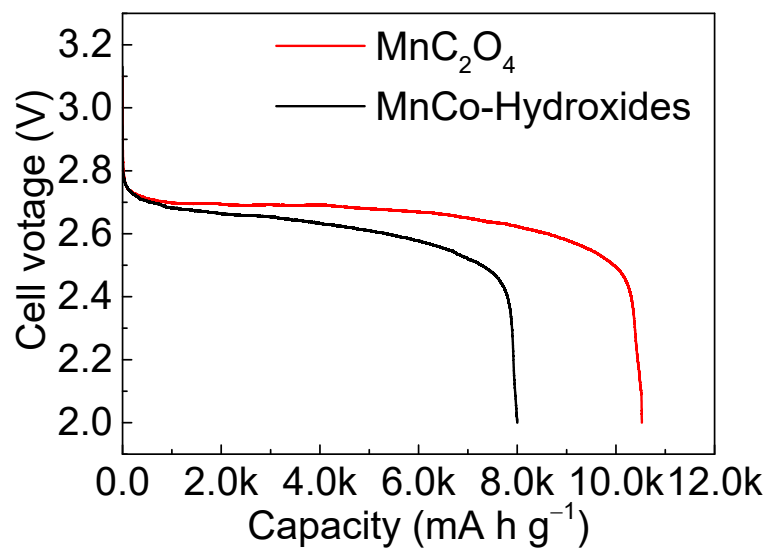

**Figure S3.** Full discharge curves of (a) MnCo<sub>2</sub>O<sub>4</sub>, and (b) MnCo-hydroxides as cathodes.

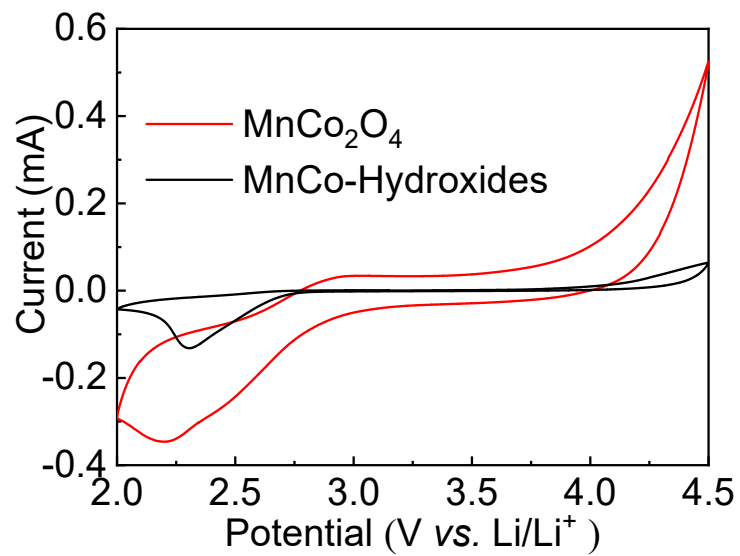

**Figure S4.** The cyclic voltammetry curves of the first cycles in the potential range of 2.0 – 4.5 V.

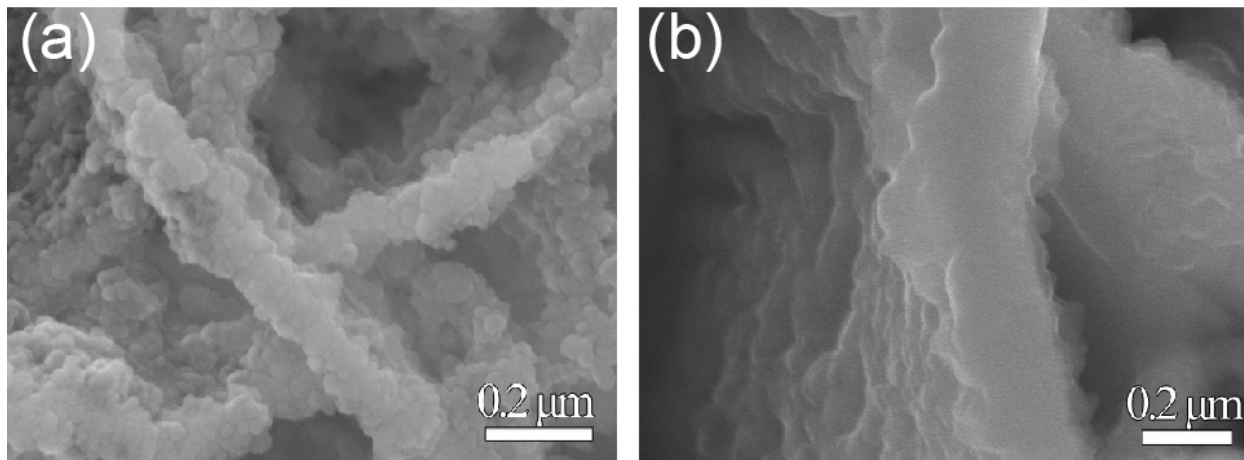

**Figure S5.** SEM images of MnCo<sub>2</sub>O<sub>4</sub> electrode at different stages (a) discharged, and (b) recharged.

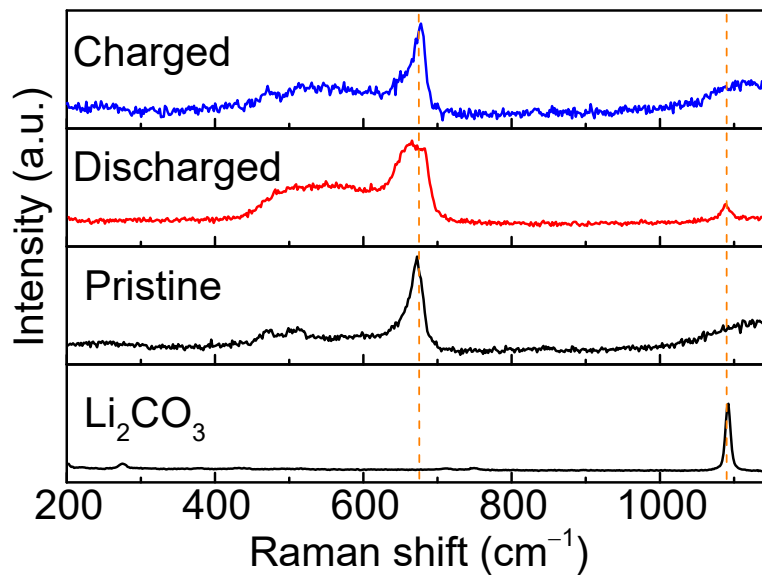

**Figure S6.** Raman spectra of MnCo<sub>2</sub>O<sub>4</sub> electrode at different stages during the first cycle.

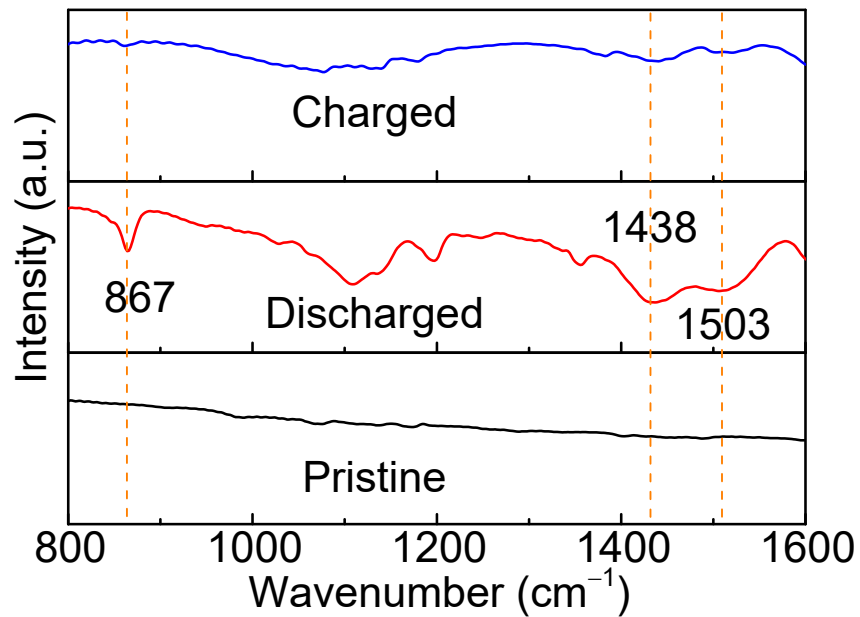

**Figure S7.** FTIR spectra of MnCo<sub>2</sub>O<sub>4</sub> electrode at different stages during the first cycle.



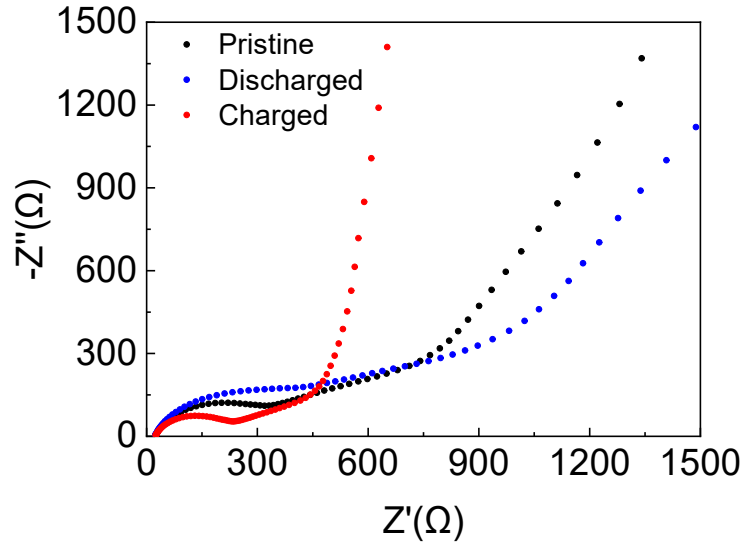

**Figure S8.** Impedance spectra of the Li-CO<sub>2</sub> battery with a MnCo<sub>2</sub>O<sub>4</sub> cathode at pristine, first discharge, and first charge states.

The Nyquist plots at different states almost demonstrate a depressed semicircle in the high-middle frequency region and an oblique straight line in the low frequency range. After a discharge process, the electrode shows an elevated resistance due to the formation of non-conductive Li<sub>2</sub>CO<sub>3</sub> on the surface of the electrode. Then the cell displays low contact and charge-transfer impedance according to the EIS result, due to the decomposition of Li<sub>2</sub>CO<sub>3</sub> in the charge process.
